# Supplementary material for: Simvastatin induces cell cycle arrest and inhibits proliferation of bladder cancer cells via PPARγ signalling pathway
Source: PubMed Central journal article supplement (PMC5078845; doi:10.1038/srep35783), 2016-10-25
Supplement: srep35783-s1.pdf [file srep35783-s1.pdf]

The title: **Simvastatin induces cell cycle arrest and inhibits proliferation of bladder cancer cells via PPAR $\gamma$  signalling pathway**

The authors: Gang Wang, Rui Cao, Yongzhi Wang, Guofeng Qian, Han C. Dan, Wei Jiang, Lingao Ju, Min Wu, Yu Xiao, Xinghuan Wang

## **Supplementary Information 1**

**Supplementary Figure S1. Top 20 ranking of affected cell function by mRNA microarray using bladder cancer tissue, compared with normal bladder tissue.**

Based on GO analysis from GCBI platform, the alteration of mitotic cell cycle (ranked 6), cell proliferation (ranked 13) and positive regulation of cell proliferation (ranked 16) in the human bladder cancer were noticed.

**Supplementary Figure S2. Upregulation of PPAR $\gamma$  mRNA expression in bladder cancer analysed by Oncomine database.** Analysis using the Oncomine database ([www.oncomine.org](http://www.oncomine.org)) revealed an increased PPAR $\gamma$  at mRNA level in bladder cancer versus normal bladder tissues.

**Supplementary Figure S3. Evaluation of BCa cell growth and viability by simvastatin treatment for 24 and 72 h.** Cell growth and viability were analysed by MTT assay using 5637 (red, marked with solid circle), EJ (violet, solid triangle) and T24 cells (green, solid square) treated by simvastatin at different concentrations of 0,

0.5, 1, 5, 10, 20 and 40  $\mu\text{M}$ , cultured for 24 (**a**) and 72 h (**b**), to determinate the correct concentration of simvastatin treatment on BCa cells.

**Supplementary Figure S4. Analysis of BCa cell migration and protein abundance of the related pathways after simvastatin treatment by wound healing assay.**

Three BCa cells 5637 (**a**), EJ (**b**) and T24 (**c**) in 6-well plates were divided into three groups for treatment by 0 (i-iii), 1 (iv-vi) and 5  $\mu\text{M}$  (vii-ix) simvastatin after the wound was generated. Wound healing assay was monitored by phase contrast microscope at 0 (i, iv, vii), 12 (ii, v, viii) and 24 h (iii, vi, ix). (**d**) and (**e**) revealed statistical analysis for cell migration after simvastatin treatment at 12 h and 24 h respectively. \*  $p < 0.05$ , \*\*  $p < 0.01$ . (**f**) Western blot analysis of phosphorylated AKT (p-AKT), total AKT (t-AKT), phosphorylated GSK3 $\beta$  (p-GSK3 $\beta$ ), total GSK3 $\beta$  (t-GSK3 $\beta$ ), ERBB1, phosphorylated p38 (p-p38) and total p38 (t-p38) in the EJ and T24 cells by simvastatin treatment at 0, 1 and 5  $\mu\text{M}$ . Protein abundance of GAPDH was used as a loading control.

**Supplementary Figure S5. Flow cytometry analysis for BCa cell apoptosis by FITC-Annexin V/PI staining assay after simvastatin treatment.**

Three types of BCa cells, 5637 (**a**), EJ (**b**) and T24 (**c**), were treated by simvastatin at 0 (i), 1 (ii) and 5  $\mu\text{M}$  (iii) for 48 h. Cell apoptosis was using flow cytometry analysis (representatively indicated in **a-c**), revealing no considerably differences of apoptosis by the effect of simvastatin.

**Supplementary Figure S6. Effect of PPAR $\alpha$ -antagonist GW6471 for cell cycle alterations triggered by simvastatin in BCa cells.** The three BCa cells EJ (a), 5637 (b) and T24 (c) were treated by GW6471 at 0  $\mu$ M (i-ii), 20  $\mu$ M (iii), 40  $\mu$ M (iv) and 60  $\mu$ M (v) for 24 h, and continually treated by simvastatin at 0  $\mu$ M (i) and 5  $\mu$ M (ii-v) for 48 h. Alterations of cell cycle were measured by flow cytometry analysis (representatively indicated in a-c) and statistically analysed (d-f), \*  $p < 0.05$ , \*\*  $p < 0.01$ , \*\*\*  $p < 0.001$ .

**Supplementary Figure S7. Effect of PPAR $\gamma$ -antagonist GW9662 on migration of the simvastatin-treated BCa cells.** The three BCa cells 5637 (a), EJ (b) and T24 (c) were treated by GW9662 at 0  $\mu$ M (i-ii), 20  $\mu$ M (iii) and 40  $\mu$ M (iv) for 24 h, and continually treated by simvastatin at 0  $\mu$ M (i) and 5  $\mu$ M (ii-v) for 48 h. Migration and invasion were revealed by the transwell assay, suggesting no strong effect of GW9662 on recovering the reduced migration and invasion rate of the BCa cells by simvastatin treatment. The scale bars for a-c are 50  $\mu$ m.

**Supplementary Figure S1.** Top 20 ranking of affected cell function by mRNA microarray using bladder cancer tissue, compared with normal bladder tissue.

| 543 in total |            | Function Analysis                                          |                        |             |
|--------------|------------|------------------------------------------------------------|------------------------|-------------|
| 序号           | GO ID      | GO Name                                                    | Diff Gene Counts in GO | Gene Amount |
| 1            | GO:0007165 | signal transduction                                        | 111                    | 1030        |
| 2            | GO:0007596 | blood coagulation                                          | 73                     | 465         |
| 3            | GO:0006955 | immune response                                            | 58                     | 351         |
| 4            | GO:0051301 | cell division                                              | 53                     | 295         |
| 5            | GO:0007155 | cell adhesion                                              | 63                     | 454         |
| 6            | GO:0000278 | mitotic cell cycle                                         | 53                     | 363         |
| 7            | GO:0000236 | mitotic prometaphase                                       | 28                     | 100         |
| 8            | GO:0044281 | small molecule metabolic process                           | 104                    | 1363        |
| 9            | GO:0030198 | extracellular matrix organization                          | 37                     | 210         |
| 10           | GO:0045087 | innate immune response                                     | 60                     | 554         |
| 11           | GO:0006954 | inflammatory response                                      | 43                     | 295         |
| 12           | GO:0000087 | M phase of mitotic cell cycle                              | 35                     | 198         |
| 13           | GO:0008283 | cell proliferation                                         | 45                     | 336         |
| 14           | GO:0030168 | platelet activation                                        | 35                     | 204         |
| 15           | GO:0007067 | mitosis                                                    | 32                     | 182         |
| 16           | GO:0008284 | positive regulation of cell proliferation                  | 48                     | 411         |
| 17           | GO:0045944 | positive regulation of transcription from RNA polymeras... | 63                     | 708         |
| 18           | GO:0006915 | apoptotic process                                          | 60                     | 654         |
| 19           | GO:0006936 | muscle contraction                                         | 22                     | 95          |
| 20           | GO:0035556 | intracellular signal transduction                          | 36                     | 284         |

**Supplementary Figure S2.** Upregulation of *PPAR $\gamma$*  mRNA expression in bladder cancer analysed by Oncomine database.

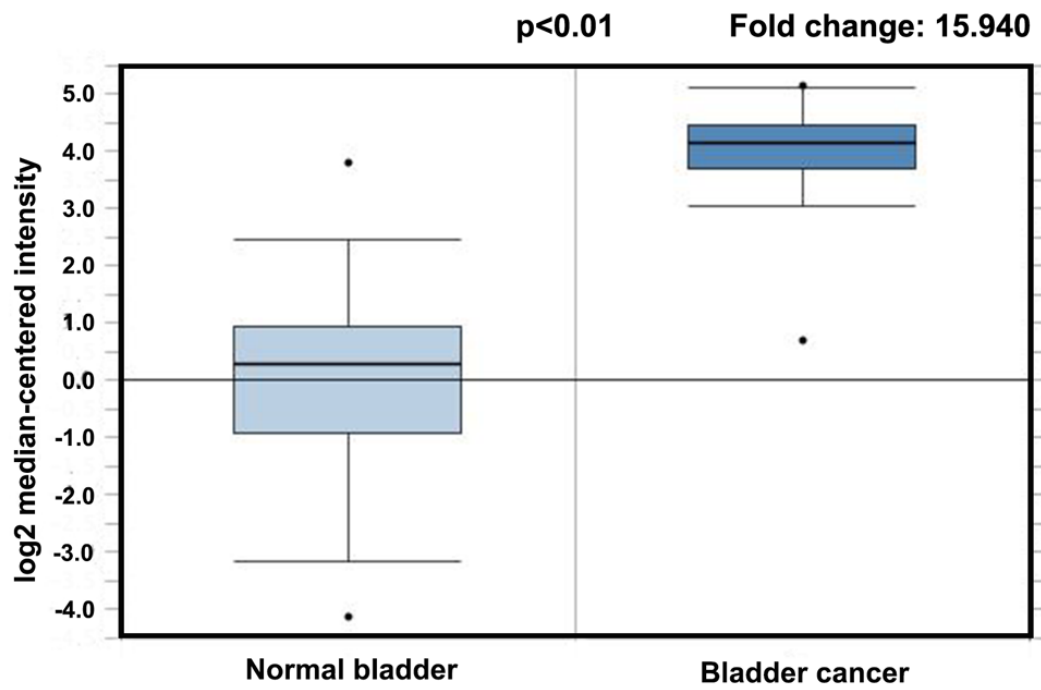

**Supplementary Figure S3.** Evaluation of BCa cell growth and viability using MTT test after simvastatin treatment for 24 and 72 h.

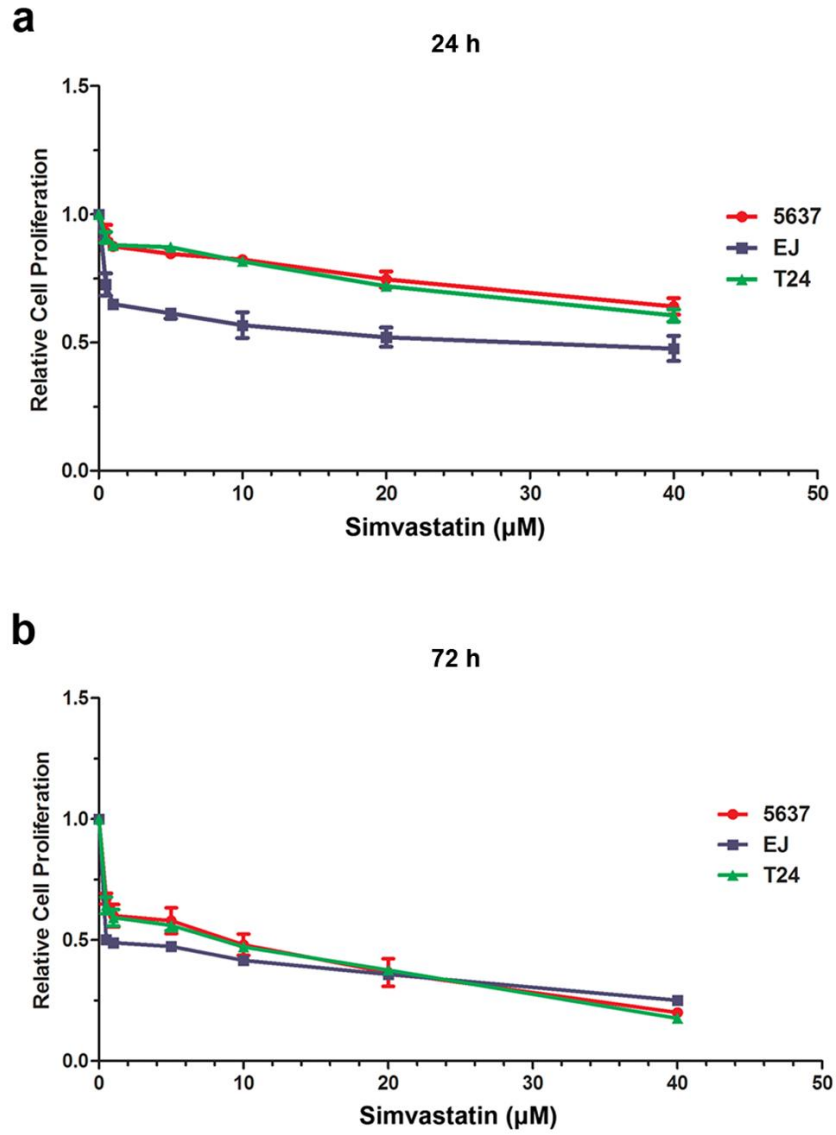

**Supplementary Figure S4.** Analysis of BCa cell migration and protein abundance of the related pathways after simvastatin treatment by wound healing assay.

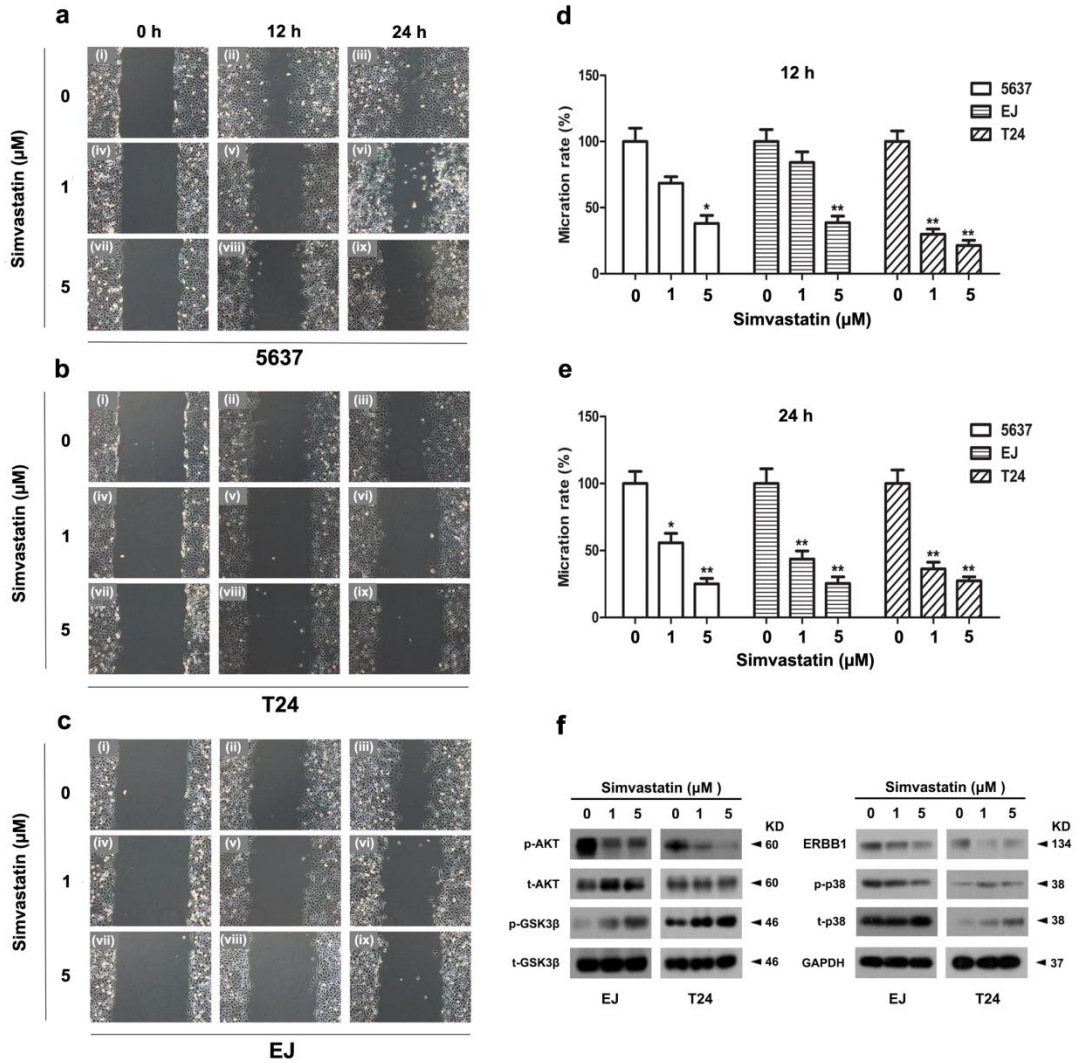

**Supplementary Figure S5.** Representative flow cytometry analysis for BCa cell apoptosis by FITC-Annexin V/PI staining assay after simvastatin treatment.

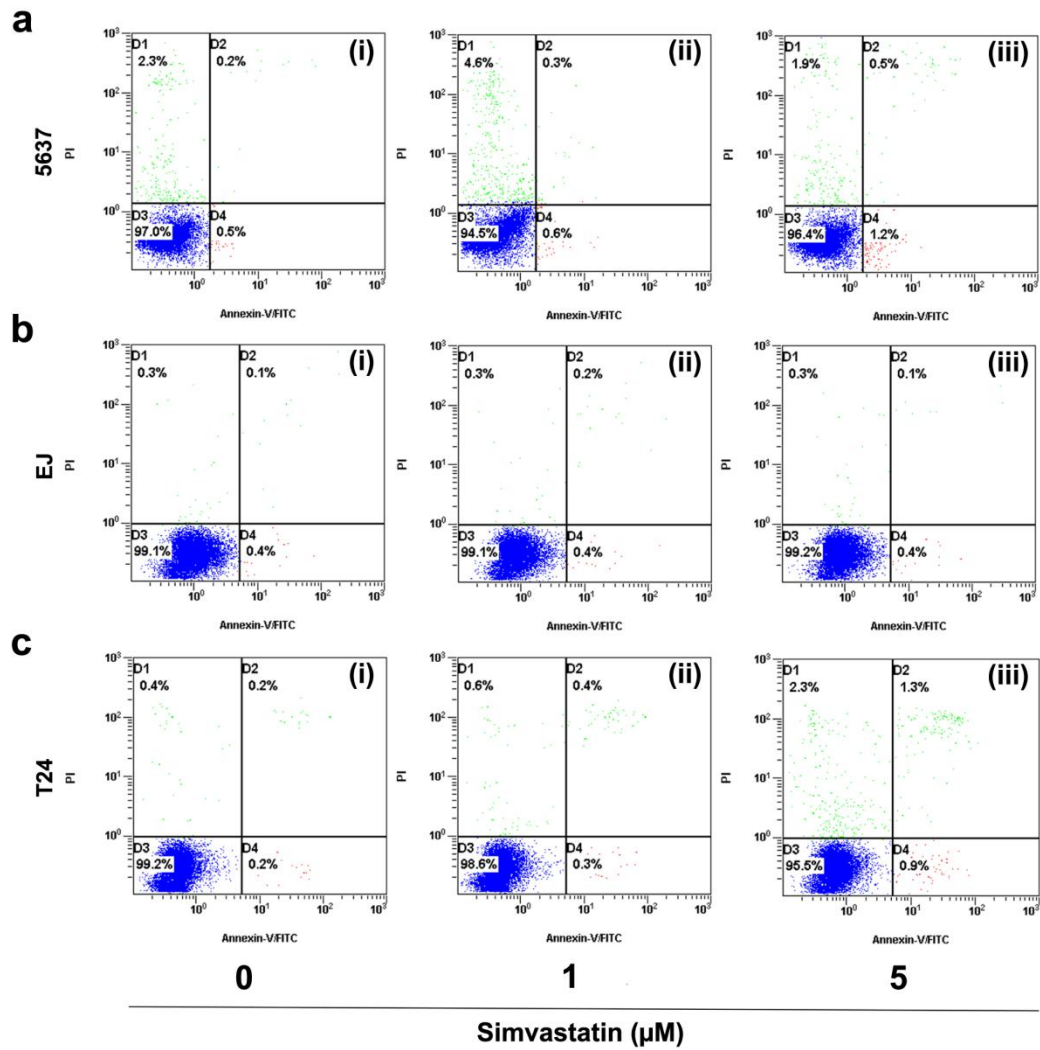



**Supplementary Figure S6.** Effect of PPAR $\alpha$ -antagonist GW6471 for cell cycle alterations triggered by simvastatin in BCa cells.

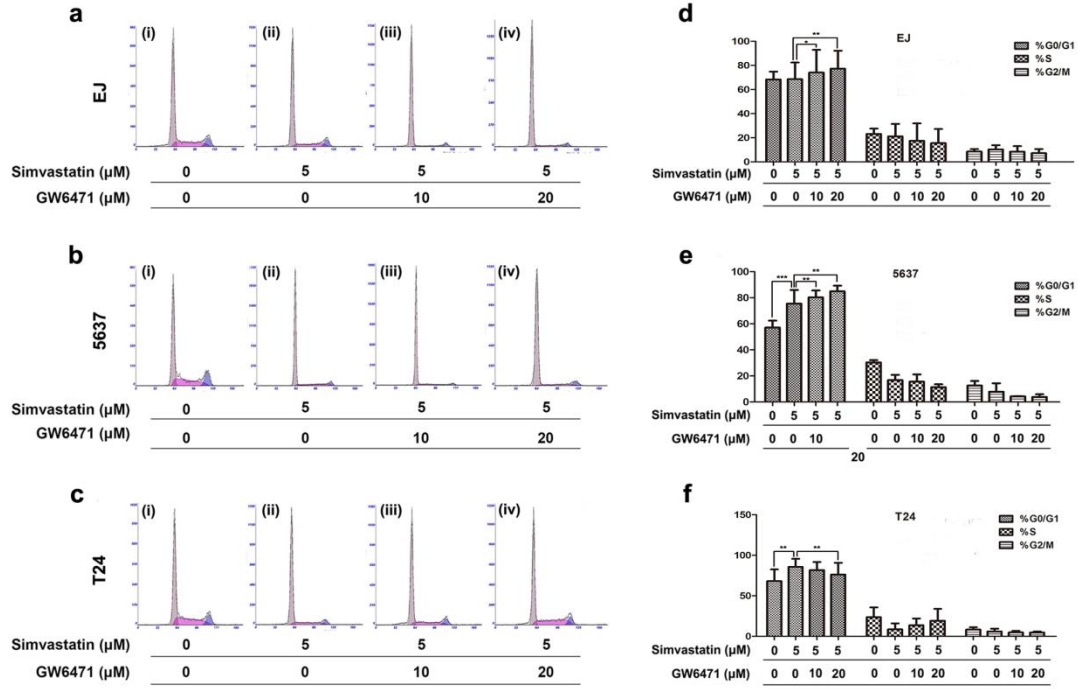

**Supplementary Figure S7.** Effect of PPAR $\gamma$ -antagonist GW9662 on migration of the simvastatin-treated BCa cells.

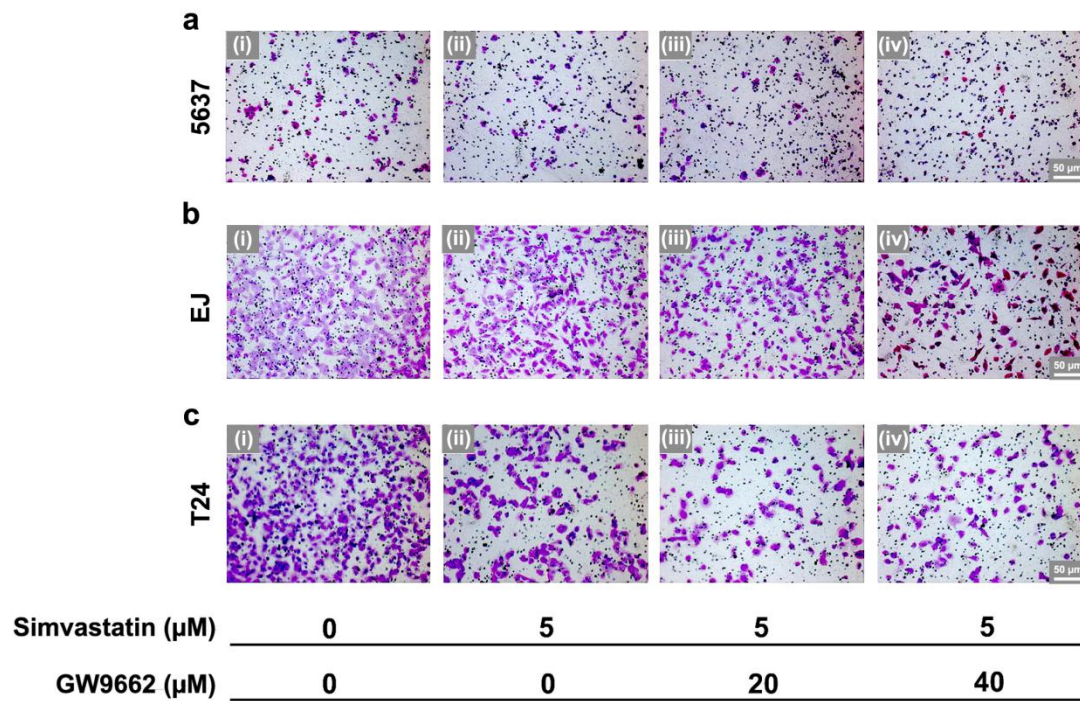

## Supplementary Information 2

**Supplementary Table S1.** Information of the patients and donors.

|                                             | <b>Patients</b>   | <b>Donors</b>  |
|---------------------------------------------|-------------------|----------------|
| <b>Number</b>                               | 3                 | 3              |
| <b>Age, years (Mean <math>\pm</math>SD)</b> | 62 $\pm$ 1.581    | 37 $\pm$ 2.327 |
| <b>Gender</b>                               | Male              | Male           |
| <b>BCa stage</b>                            | Stage II          | —              |
| <b>Surgical method</b>                      | Radical resection | —              |

**Note:** Stage II means BCa goes into muscle layer of the bladder.

**Supplementary Table S2.** Significantly altered genes and pathways related with bladder cancer by mRNA microarray using bladder cancer tissues versus normal bladder tissues.

| Pathway ID | Pathway Name            | Diff Gene Counts in Pathway | Gene Amount in Pathway | Enrichment Score | p-value  | FDR       | Gene Symbols                                                                                                                                       |
|------------|-------------------------|-----------------------------|------------------------|------------------|----------|-----------|----------------------------------------------------------------------------------------------------------------------------------------------------|
| 4110       | Cell cycle              | 18                          | 124                    | 4.92504304       | 5.39E-08 | 3.68E-07  | PTTG1 PLK1 CCNB2 CCNA2 GADD45B CCNE2 CDC25C MAD2L1 CDC20 CDK1 CCND1 BUB1 CHEK1 CCND2 CDC7 TTK CCNB1 CDC6                                           |
| 4115       | p53 signalling pathway  | 13                          | 68                     | 6.48624949       | 1.66E-07 | 1.02E-06  | RRM2 CCNE2 CCNB1 CCND1 THBS1 IGF1 CCND2 CCNG1 CHEK1 CCNB2 GADD45B CDK1 SERPINE1                                                                    |
| 5200       | Pathways in cancer      | 27                          | 327                    | 2.80140063       | 3.72E-06 | 1.82E-05  | RUNX1T1 AR CSF1R COL4A5 EGLN3 FGF10 NRAS HHIP COL4A1 CCND1 IL6 IGF1 KIT AKT3 RARB PRKCB BRCA2 IL8 PTCH1 MMP9 CKS2 MMP1 GLI3 KITLG HIF1A FZD7 CCNE2 |
| 3320       | PPAR signalling pathway | 11                          | 71                     | 5.25646221       | 1.42E-05 | 5.46E-05  | ADIPOQ OLR1 GK ILK SCD PLTP ACSL1 SORBS1 MMP1 LPL CD36                                                                                             |
| 561        | Glycerolipid metabolism | 9                           | 55                     | 5.55186669       | 6.13E-05 | 0.0002154 | LPL GLA GK DGKB PPAP2B ALDH1B1 AKR1B10 ALDH3A2 DGKE                                                                                                |

|      |                         |   |    |            |           |           |                                                     |
|------|-------------------------|---|----|------------|-----------|-----------|-----------------------------------------------------|
| 71   | Fatty acid degradation  | 8 | 44 | 6.16874077 | 7.69E-05  | 0.0002552 | ADH1C ACAT1 ACADSB ADH1B ALDH1B1 ACSL1 ALDH3A2 ADH5 |
| 5219 | Bladder cancer          | 7 | 38 | 6.24990841 | 0.0002156 | 0.0006606 | NRAS THBS1 MMP1 MMP9 CCND1 IL8 RPS6KA5              |
| 4012 | ErbB signalling pathway | 9 | 88 | 3.46991668 | 0.0023192 | 0.0055989 | CAMK2G NRAS AREG GAB1 EREG PAK6 AKT3 BTC PRKCB      |
| 61   | Fatty acid biosynthesis | 2 | 6  | 11.3093581 | 0.0240649 | 0.0429218 | ACACB ACACA                                         |

**Supplementary Table S3.** List of primers for semiquantitative RT-PCR and qRT-PCR.

| Gene                                             | Symbol                         | Forward primer (5'-3')              | Reverse primer (5'-3')               | Annealing Temperature ( °C) | Length (bp) |
|--------------------------------------------------|--------------------------------|-------------------------------------|--------------------------------------|-----------------------------|-------------|
| Amphiregulin                                     | <i>AREG</i>                    | 5'-TGCTGGATTGGAC<br>CTCAATG-3'      | 5'-TCCCGAGGACGGT<br>TCACTAC-3'       | 56                          | 163         |
| Epidermal growth factor receptor                 | <i>ERBB1</i>                   | 5'-GGTGCGAATGACA<br>GTAGCATTATGA-3' | 5'-AAAGGTGGGCTCC<br>TAACTAGCTGAA-3'  | 56                          | 184         |
| Erb-b2 receptor tyrosine kinase 2                | <i>ERBB2</i>                   | 5'-CAGGCACCGCAGC<br>TCATCTA-3'      | 5'-TCCCAGGTCACCA<br>TCAAATACATC-3'   | 56                          | 139         |
| Erb-b2 receptor tyrosine kinase 3                | <i>ERBB3</i>                   | 5'-CCCTGCCATGAGA<br>ACTGCAC-3'      | 5'-TCACTGTCAAAGC<br>CATTGTCTCAGAT-3' | 56                          | 112         |
| Erb-b2 receptor tyrosine kinase 4                | <i>ERBB4</i>                   | 5'-TGATAGGCCGTTG<br>GTTGTCTGA-3'    | 5'-CCAGGTAGACATA<br>CCCAATCCAGTG-3'  | 56                          | 149         |
| Epiregulin                                       | <i>EREG</i>                    | 5'-CTGCCTGGGTTTCC<br>ATCTTCT-3'     | 5'-GCCATTCATGTCA<br>GAGCTACACT-3'    | 56                          | 163         |
| GRB2 associated binding protein 1                | <i>GAB1</i>                    | 5'-ATCAGAAACGCCA<br>GCGAAGA-3'      | 5'-TCAGATACCACAA<br>AGCACCA-3'       | 56                          | 209         |
| Glyceraldehyde-3-phosphate dehydrogenase         | <i>GAPDH</i>                   | 5'-TGCACCACCAACT<br>GCTTAG -3'      | 5'-GATGCAGGGATGA<br>TGTTTC -3'       | 56                          | 176         |
| Peroxisome proliferator activated receptor alpha | <i>PPAR<math>\alpha</math></i> | 5'-ACTCTGCCCCCTCT<br>CGCCACTC-3'    | 5'-GCCAAAGCTTCCA<br>GAACTATCCTC-3'   | 60                          | 130         |
| Peroxisome proliferator activated receptor delta | <i>PPAR<math>\beta</math></i>  | 5'-GAGCAGCCACAGG<br>AGGAAGCC-3'     | 5'-GCTGTGGTCCCCC<br>AT-3'            | 56                          | 100         |
| Peroxisome proliferator activated receptor gamma | <i>PPAR<math>\gamma</math></i> | 5'-AGAGATGCCATTCT<br>GGCCAC-3'      | 5'-GTGGAGTAGAAAT<br>GCTGGAGA-3'      | 56                          | 128         |

**Supplementary Table S4.** List of primary antibodies.

| Antigens                                                | Species antibodies raised in | Dilution (IF) | Dilution (WB) | Supplier                                               |
|---------------------------------------------------------|------------------------------|---------------|---------------|--------------------------------------------------------|
| E-Cadherin, human                                       | Rabbit, monoclonal           | 1:200         | 1:1,000       | Cell Signaling Technology, USA, Cat. No: #3195         |
| N-Cadherin, human                                       | Rabbit, monoclonal           | 1:200         | 1:1,000       | Cell Signaling Technology, USA, Cat. No: #13116        |
| Vimentin, human                                         | Rabbit, monoclonal           | 1:200         | 1:10,00       | Cell Signaling Technology, USA, Cat. No: #5741         |
| $\beta$ -Catenin, human                                 | Rabbit, monoclonal           | -             | 1:1,000       | Cell Signaling Technology, USA, Cat. No: #8480         |
| Claudin-1, human                                        | Rabbit, monoclonal           | -             | 1:1,000       | Cell Signaling Technology, USA, Cat. No: #13255        |
| MMP-2, human                                            | Rabbit, monoclonal           | -             | 1:500         | Cell Signaling Technology, USA, Cat. No: #13132        |
| Glyceraldehyde 3-phosphate dehydrogenase (GAPDH), human | Mouse, monoclonal            | -             | 1:2,000       | Santa Cruz Biotechnology Inc., USA, Cat. No: sc-365062 |
| Cyclin D1, human                                        | Rabbit, monoclonal           | -             | 1:1,000       | Cell Signaling Technology, USA, Cat. No: #2978S        |
| CDK4, human                                             | Rabbit, monoclonal           | -             | 1:1,000       | Abcam, UK, Cat. No: ab108357                           |
| CDK6, human                                             | Rabbit, monoclonal           | -             | 1:1,000       | Abcam, UK, Cat. No: ab124821                           |
| Caspase 3, human                                        | Rabbit, monoclonal           | -             | 1:1,000       | Cell Signaling Technology, USA, Cat. No: #9665P        |
| Caspase 9, human                                        | Rabbit, monoclonal           | -             | 1:1,000       | Cell Signaling Technology, USA, Cat. No: #9508P        |
| Cleaved Caspase 3, human                                | Rabbit, monoclonal           | -             | 1:1,000       | Cell Signaling Technology, USA, Cat. No: #9664P        |
| Cleaved Caspase 9, human                                | Rabbit, monoclonal           | -             | 1:1,000       | Cell Signaling Technology, USA, Cat. No: #7237P        |
| ERBB1, human                                            | Rabbit, monoclonal           | -             | 1:1,000       | Abcam, UK, Cat. No: ab52894                            |
| PPAR $\gamma$ , human                                   | Rabbit, monoclonal           | -             | 1:1,000       | Abcam, UK, Cat. No: ab45036                            |
| p-p38, human                                            | Rabbit, monoclonal           | -             | 1:1,000       | Cell Signaling Technology, USA, Cat. No: #9211S        |
| t-p38, human                                            | Rabbit, monoclonal           | -             | 1:1,000       | Cell Signaling Technology, USA, Cat. No: #9212S        |
| p-AKT, human                                            | Rabbit, monoclonal           | -             | 1:1,000       | Cell Signaling Technology, USA, Cat. No: #4060P        |
| t-AKT, human                                            | Rabbit, monoclonal           | -             | 1:1,000       | Cell Signaling Technology, USA, Cat.                   |

|                        |                    |   |          |                                                  |
|------------------------|--------------------|---|----------|--------------------------------------------------|
|                        |                    |   |          | No: #4691L                                       |
| p-GSK3 $\beta$ , human | Rabbit, monoclonal | - | 1:1,0000 | Cell Signaling Technology, USA, Cat. No: #5558S  |
| t-GSK3 $\beta$ , human | Rabbit, monoclonal | - | 1:1,0000 | Cell Signaling Technology, USA, Cat. No: #12456S |



**Supplementary Table S5.** List of secondary antibodies and counterstaining of nuclei.

| <b>Secondary detection system used</b>                                           | <b>Host</b> | <b>Method</b> | <b>Dilution</b> | <b>Supplier</b>                                              |
|----------------------------------------------------------------------------------|-------------|---------------|-----------------|--------------------------------------------------------------|
| Anti-Mouse-IgG (H+L)-HRP                                                         | Goat        | WB            | 1:10,000        | Sungene Biotech, China, Cat. #LK2003                         |
| Anti-Rabbit-IgG (H+L)-HRP                                                        | Goat        | WB            | 1:5,000         | Sungene Biotech, China, Cat. #LK2001                         |
| Anti-rabbit IgG (H+L), F (ab') <sub>2</sub> Fragment (Alexa Fluor 555 Conjugate) | Goat        | IF            | 1:50            | Cell Signaling Technology, USA, Cat. #4413                   |
| Hoechst 33342 (1 mg/ml) nucleic acid staining (DAPI)                             | -           | IF            | 1:750           | Molecular Probes/Invitrogen, Carlsbad, CA, USA, Cat. #A11007 |
